# Supplementary material
Source: PubMed Central journal article supplement (PMC2812074)
Supplement: supp_mol.109.061788_FigureS1.pdf [file supp_mol.109.061788_FigureS1.pdf]

# Supplemental Figure 1

## Reaction Scheme 1

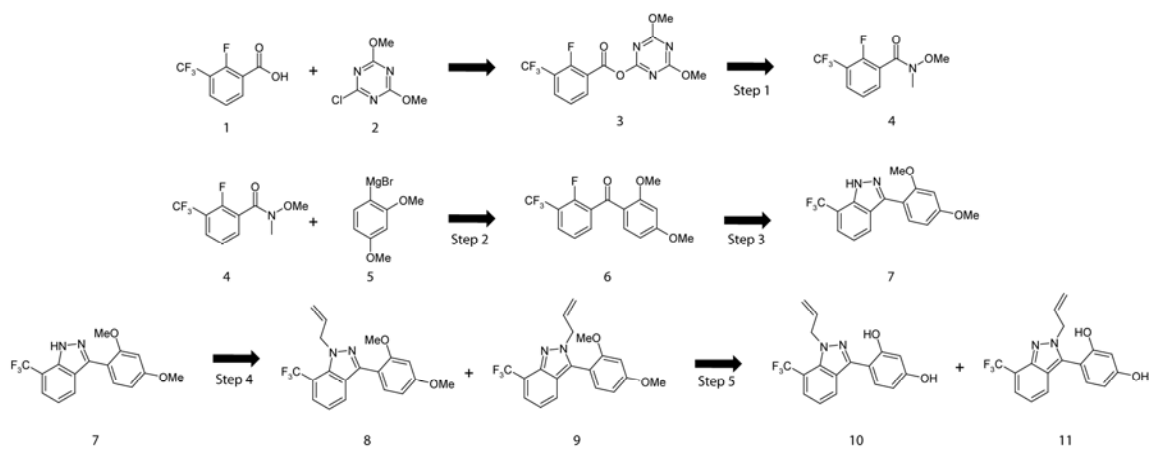

**Supplemental figure 1. Reaction scheme for the synthesis of Way-169916.** Illustration of the reaction scheme utilized for the chemical synthesis of Way-169916, as detailed in supplemental information.
