# Supplementary material
Source: PubMed Central journal article supplement (PMC2812074)
Supplement: supp_mol.109.061788_FigureS2.pdf [file supp_mol.109.061788_FigureS2.pdf]

Supplemental Figure 2

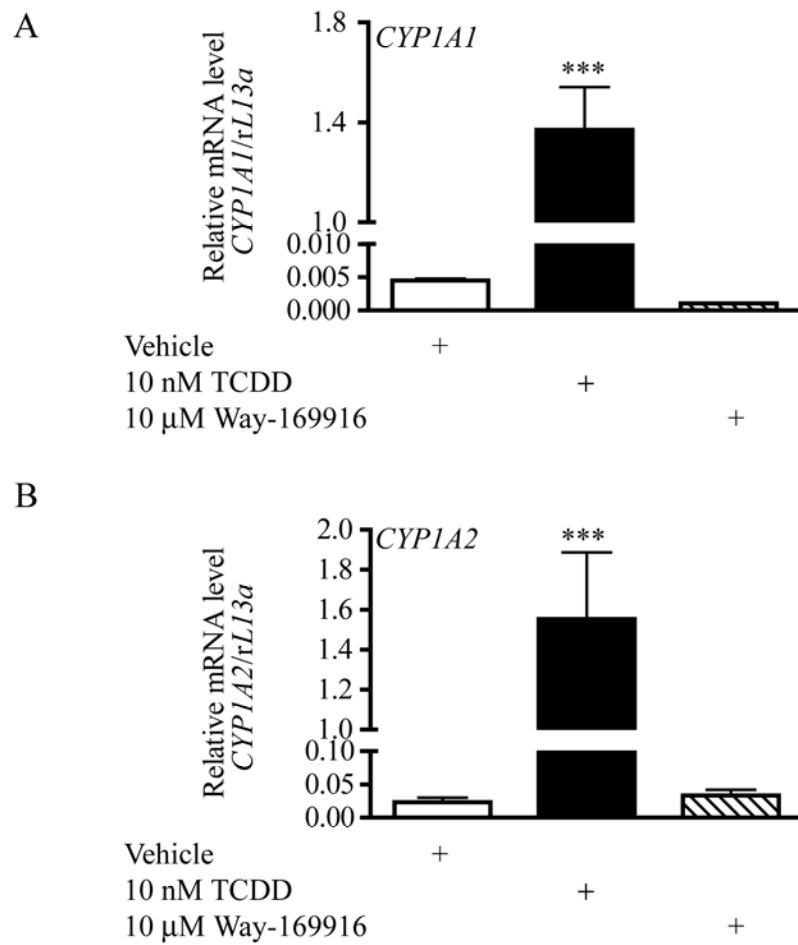

**Supplemental figure 2. Way-169916 fails to induce AHR-dependent gene expression in MCF-7 cells.**

MCF-7 cells were treated with either vehicle (DMSO), 10 nM TCDD or 10  $\mu$ M Way-169916 as indicated for 4 h. Total RNA was isolated, reverse transcribed to cDNA and used as a template for quantitative RT-PCR analysis of human (A) *CYP1A1* and (B) *CYP1A2* expression. Data represent mean *CYP1A1* *CYP1A2* mRNA  $\pm$  SEM level normalized against human *rL13A* mRNA.
